# Supplementary material for: Inhibiting nighttime melatonin and boosting cortisol increase patrolling monocytes, phagocytosis, and myelination in a murine model of multiple sclerosis
Source: PubMed Central journal article supplement (PMC9898548; doi:10.1038/s12276-023-00925-1), 2023-01-13
Supplement: 12276_2023_925_MOESM1_ESM.pdf [file 12276_2023_925_MOESM1_ESM.pdf]

**Supplementary Table 1:** List of antibodies used in this study for tissue immunofluorescent staining and Fluorescence-Activated Cell Sorting (FACS) analysis.

| <b>Num</b> | <b>Product</b>                 | <b>CAS No.</b> | <b>Vendor</b>     |
|------------|--------------------------------|----------------|-------------------|
| 1          | Rabbit Melatonin Receptor 1A   | Orb221456      | Boorbyt           |
| 2          | Rabbit Melatonin Receptor 1B   | NLS932         | Novus Biologicals |
| 3          | Rabbit Anti-Olig2              | AB9610         | Millipore         |
| 4          | Mouse Anti-APC (CC1)           | OP80           | Calbiochem        |
| 5          | Rat Anti-BrdU                  | AB6326         | Abcam             |
| 6          | Rat Anti-SOX2                  | 14-9811-82     | Invitrogen        |
| 7          | Rabbit Anti-Ki67               | NB110-57147    | Novus Biologicals |
| 7          | Rabbit Anti-Caspase-3          | 9664S          | Cell Signaling    |
| 8          | Rat anti Mouse CD68            | MCA1957        | BIORAD            |
| 9          | DAPI                           | D3571          | Invitrogen        |
| 10         | Mouse CD11b, AF700             | 56-0112-82     | Invitrogen        |
| 11         | Mouse Ly-6C, V450              | 560594         | BDbioscience      |
| 12         | Mouse Ly6G, PE                 | 551461         | BDbioscience      |
| 13         | Mouse CD45, V500               | 561487         | BDbioscience      |
| 14         | CD16/CD32 (Mouse BD Fc Block™) | 553142         | BDbioscience      |
| 15         | LIVE/DEAD™ Dead Cell Stain Kit | L23105         | Invitrogen        |

**Supplementary Table 2:** List of chemical products and drugs used in the study.

| <b>Num</b> | <b>Product</b>                                | <b>CAS No.</b> | <b>Vendor</b> |
|------------|-----------------------------------------------|----------------|---------------|
| 1          | Melatonin                                     | sc-207848B     | Santa Cruz    |
| 2          | Luzindole                                     | sc-202700B     | Santa Cruz    |
| 3          | 5-Bromo-2'-deoxyuridine (BrdU)                | B5002          | Millipore     |
| 4          | Solvent Blue 38 practical grade (LFB)         | S3382          | Sigma-Aldrich |
| 5          | Bis(cyclohexanone)oxaldihydrazone (Cuprizone) | 14690          | Sigma-Aldrich |
| 6          | Mouse Melatonin (MT) ELISA Kit                | MBS263465      | MyBioSource   |
| 7          | Mouse Cortisol ELISA Kit                      | MBS704879      | MyBioSource   |

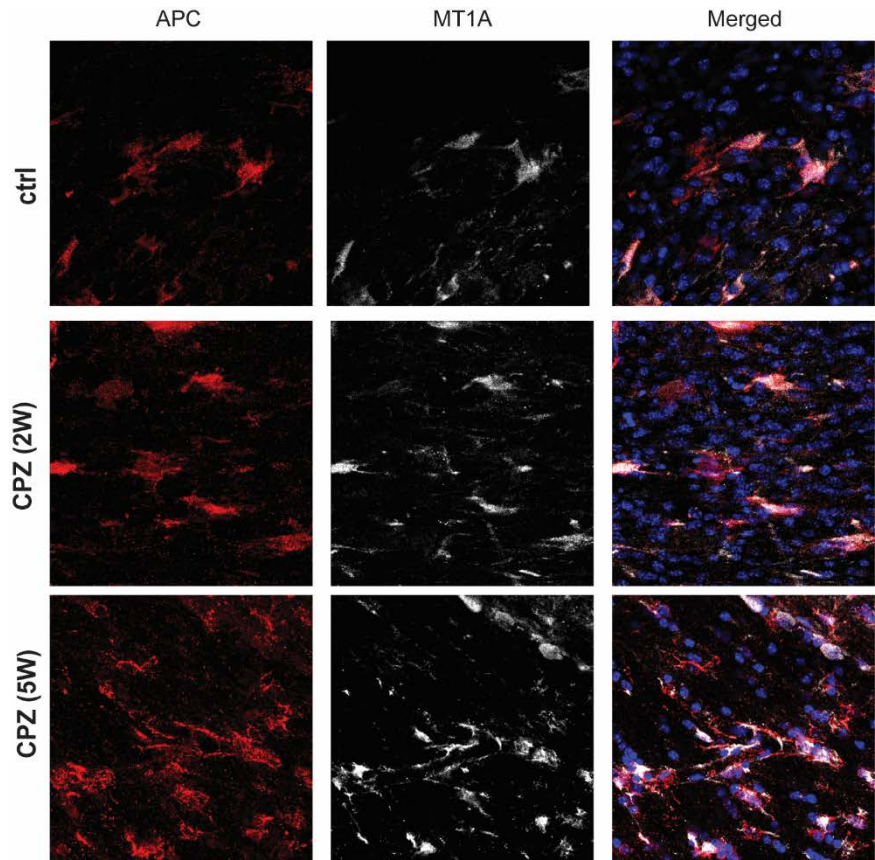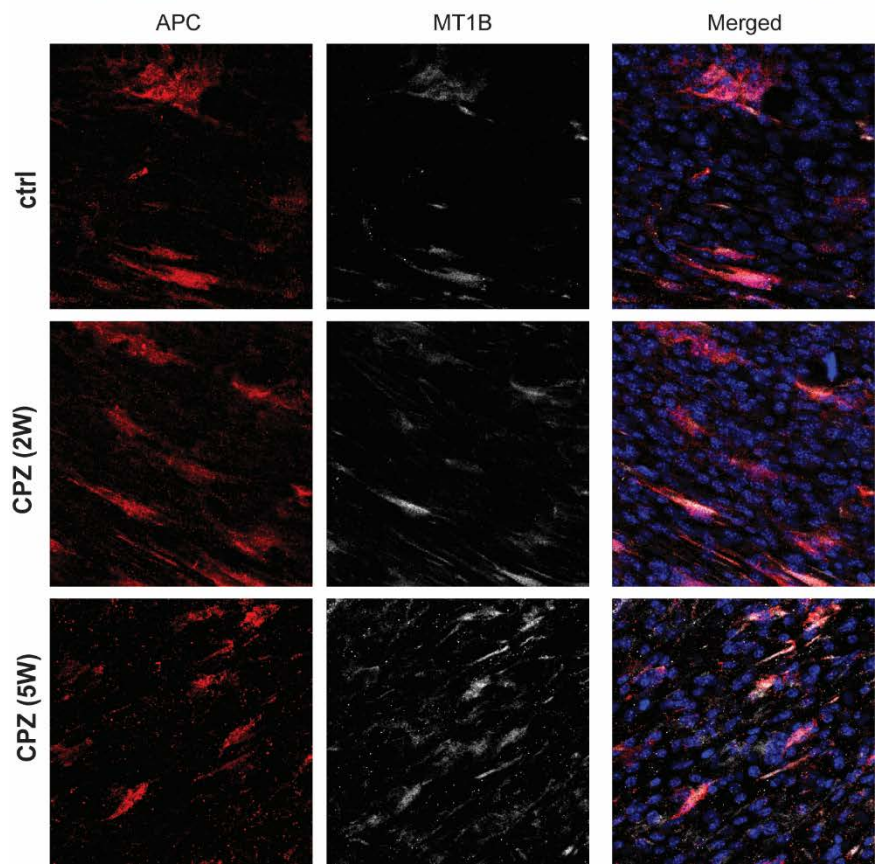

**Supplementary Fig. 1: Representative immunofluorescent images of MT expressing APC-oligodendrocyte.** The expression of MT1A and MT1B examined before cuprizone diet, two and five weeks after cuprizone. All APC oligodendrocytes expressed MT receptors at all time points.
